# Supplementary material for: Transposons are a major contributor to gene expression variability under selection in rice populations
Source: Research Square preprint supplement (doi:10.21203/rs.3.rs-2197876/v1), 2022-10-25
Supplement: Supplementary file 1 [file 272aad89adf075ce77ffa4a7.docx]

**Evaluation of TIP-calling performance in our dataset**

Re-sequencing data from 48 indica rice accessions randomly sampled from our dataset were used to identify TIPs with the objective of evaluating the performance of TIP calling. MH63 was included among these accessions. This variety has a chromosome-level assembly as well as short-read re-sequencing data publicly available. MH63 sequencing short-reads were obtained from NCBI SRA accession SRX1639978 1 and subsampled to 15X to match the mean coverage of the full dataset. TIP detection was carried out using Nipponbare genome as reference, and the “joint” mode of PopoolationTE2, with the parameters described in the methods section. We detected a total of 30,993 TIPs. In the MH63 accession 26,638 corresponded to a TIP “presence”, and 4,091 to a TIP “absence”. For each TIP (presence or absence, Nipponbare coordinates) we detected the orthologous region in the MH63 assembled genome by mapping the TIP region (20 Kb centered on the TIP) to the assembly using minimap2 2. Using a stringent filtering, we identified confident orthologous regions for 78% of the TIP regions in MH63 (19,980 corresponding to TIP presence and 2,981 to TIP absence). We used RepeatMasker to annotate TEs in these MH63 assembled regions, and used the annotated TEs to benchmark precision and sensitivity of the TIP calls, according to the following formulas:

Sensitivity = TP/ (TP+ FN)

Precision = TP/ (TP + FP)

True positives (TP) were TIPs detected by PopoolationTE2 that could be detected in the MH63 orthologous region by RepeatMasker. False positives were TIPs detected by PopoolationTE2 that had no TE of the same family annotated by RepeatMasker in the corresponding region of MH63. False negatives (FN) were cases when the TIP prediction of MH63 was an absence, but the assembled region contained the TE detected by RepeatMasker.

References

1. Li H. Minimap2: pairwise alignment for nucleotide sequences. Bioinformatics. 2018;34:3094–100. doi:10.1093/bioinformatics/bty191.

2. Zhang J, Chen L-L, Sun S, Kudrna D, Copetti D, Li W, et al. Building two indica rice reference genomes with PacBio long-read and Illumina paired-end sequencing data. Sci Data. 2016;3:160076. doi:10.1038/sdata.2016.76.
