# Supplementary material for: Transposons are a major contributor to gene expression variability under selection in rice populations
Source: Research Square preprint supplement (doi:10.21203/rs.3.rs-2197876/v1), 2022-10-25
Supplement: Supplementary file 3 [file cd44304e68881933fa4ceef9.xlsx]

## Sheet: Sheet1
Supplementary Table 6. Statistical significance of the permutation test performed to identify selection on OsJAZ1, OsGAP and OsMPH1. Only the haplotypes that cleared the p-value cutoff of 0.01 were reported to be under selection.
		Japonica				Indica
Gene	Haplotype	pi		H12		pi		H12
		mean	p-val	mean	p-val	mean	p-val	mean	p-val
OsEG2	HapA	9.5228e-05	0.0009	0.946711	0.0009	0.0018	0.001	0.779	0.0009
	HapB	0.00174769	0.006	0.604855	0.2	0.0017	0.0009	0.69	0.0009
OsGAP	HapA	0.00022	0.0009	0.956512	0.0009	Not an eQTL in indica
	HapB	0.0028	0.0009	0.613437	0.0489
OsMPH1	HapA	2.68782e-05	0.0009	0.957586	0.0009	0.0002	0.0009	0.916437	0.0009
	HapB	0.00175	0.28	0.522059	1	0.0019	0.41	0.414901	0.96
